# Supplementary material for: The Risk Factors and Mechanisms of Azole Resistance of Candida tropicalis Blood Isolates in Thailand: A Retrospective Cohort Study
Source: MDPI journal article supplement (doi:10.3390/jof8100983), 2022-09-20
Supplement: s1 [file s1]

**Table S1.** Primers used in this study.

| Genes              | Sequence (5'-3')       | Reference  |
|--------------------|------------------------|------------|
| ERG11-1F           | TCTGACATGGTGTGTGTGTG   | [1]        |
| ERG11-1R           | ATTGATGCCATCAATGGCAG   | [1]        |
| ERG11-2F           | ATCCACAGGCTTATTTGAAA   | [1]        |
| ERG11-2R           | GGTCTCTTTCCTTGGTTTTG   | [1]        |
| ERG11-3F           | TGCTGAAGAAGCTTATACCC   | [1]        |
| ERG11-3R           | CAAGGAATCAATCAAATCTCTC | [1]        |
| ERG11-4F           | TTACTGGAGACGTGACGCTG   | This study |
| ERG11-4R           | GGTGATCTGTGTCCGTTGGT   | This study |
| ERG11-F for RT-PCR | CTACTCCCAAAAAAACCATA   | [2]        |
| ERG11-R for RT-PCR | TAAACCTAATCCCAAGACATC  | [2]        |
| MDR1-F             | TAAAGCAGGCTGGAGATGGA   | [1]        |
| MDR1-R             | ACAACCTCCAACCTATAGCTA  | [1]        |
| CDR1-F             | TGAAGCCAGACCCGTAGTTG   | [1]        |
| CDR1-R             | CCACTTTGCCCATCCTAACA   | [1]        |
| ACT-F              | TTTACGCTGGTTTCTCCTTGCC | [1]        |
| ACT-R              | GCAGCTTCCAAACCTAAATCGG | [1]        |

**Table S2.** Antifungal susceptibility test results, missense mutation of *ERG11* gene and gene expression levels of *Candida tropicalis* blood isolates.

| Isolate number                 | MIC (minimal inhibitory concentration, µg/ml) |      |      |      |      |       |       |        |      |      | Missense mutations in <i>ERG11</i> gene | Fold expression level (log <sub>2</sub> ) |             |             |
|--------------------------------|-----------------------------------------------|------|------|------|------|-------|-------|--------|------|------|-----------------------------------------|-------------------------------------------|-------------|-------------|
|                                | FZ*                                           | FZ** | IZ   | VOR  | PZ   | FC    | AND   | MF     | CAS  | AB   |                                         | <i>ERG11</i>                              | <i>MDR1</i> | <i>CDR1</i> |
| Fluconazole-resistant isolates |                                               |      |      |      |      |       |       |        |      |      |                                         |                                           |             |             |
| 2                              | 8                                             | 16   | 0.25 | 0.25 | 0.12 | <0.06 | 0.12  | 0.06   | 0.12 | 1    | ND                                      | N/A                                       | N/A         | N/A         |
| 4                              | 128                                           | >256 | 4    | 0.5  | 0.5  | 0.12  | 0.12  | 0.03   | 0.12 | 1    | A395W, C461Y, T769C                     | 1.18                                      | 1.94        | 0.91        |
| 8                              | >256                                          | >256 | >8   | 1    | 0.5  | <0.06 | 0.015 | 0.06   | 0.03 | 0.5  | A395T, C461T                            | 2.30                                      | 1.59        | 1.11        |
| 10                             | >256                                          | >256 | >8   | 1    | 0.5  | <0.06 | 0.25  | 0.03   | 0.12 | 0.5  | A395T, C461T                            | 1.25                                      | 0.15        | 0.86        |
| 16                             | >256                                          | >256 | >8   | 0.5  | 0.5  | <0.06 | 0.06  | 0.03   | 0.06 | 0.25 | A395T, C461T                            | 1.19                                      | 0.87        | 1.27        |
| 17                             | 256                                           | 256  | >8   | 0.5  | 0.5  | <0.06 | 0.12  | 0.03   | 0.25 | 1    | A395T, C461T                            | 0.84                                      | 1.20        | 0.77        |
| 19                             | >256                                          | >256 | >8   | 1    | 1    | <0.06 | 0.06  | 0.03   | 0.06 | 0.5  | A395T, C461T                            | 1.57                                      | 1.13        | 1.76        |
| 20                             | 256                                           | >256 | >8   | 1    | 1    | <0.06 | 0.12  | 0.03   | 0.06 | 1    | A395T, C461T                            | 1.07                                      | 0.99        | 1.28        |
| 23                             | >256                                          | 64   | >8   | 0.5  | 0.5  | <0.06 | 0.03  | <0.008 | 0.06 | 0.25 | A395T, C461T                            | N/A                                       | N/A         | N/A         |
| 30                             | >256                                          | >256 | >8   | 1    | 1    | <0.06 | 0.12  | 0.03   | 0.5  | 1    | A395T, C461T                            | 1.58                                      | 1.64        | 1.03        |
| 41                             | >256                                          | 256  | >8   | 1    | 1    | <0.06 | 0.12  | 0.03   | 0.12 | 1    | A395T, C461T                            | 0.65                                      | 1.77        | 0.82        |
| 43                             | 64                                            | 128  | 2    | 1    | 1    | <0.06 | 0.12  | 0.03   | 0.06 | 1    | A428G                                   | 1.06                                      | 0.83        | 0.89        |
| 49                             | 128                                           | 128  | 4    | 0.12 | 0.12 | <0.06 | 0.12  | 0.03   | 0.06 | 0.12 | A395T, C461T                            | 1.67                                      | 1.55        | 1.52        |
| 56                             | >256                                          | >256 | >8   | 1    | 1    | <0.06 | 0.06  | 0.03   | 0.06 | 1    | A395T, C461T                            | 0.78                                      | 0.29        | 1.24        |
| 61                             | 32                                            | 64   | 2    | 0.25 | 0.25 | 0.06  | 0.06  | 0.03   | 0.12 | 1    | A395W, C461Y                            | 1.21                                      | 0.78        | 0.85        |
| 64                             | >256                                          | >256 | >8   | 1    | 1    | <0.06 | 0.12  | 0.03   | 0.06 | 1    | A395T, C461T                            | 0.98                                      | 0.38        | 0.62        |
| 67                             | >256                                          | >256 | >8   | 2    | 2    | <0.06 | 0.06  | 0.03   | 0.06 | 0.5  | A395T, C461T                            | 0.72                                      | 0.61        | 0.78        |
| 68                             | >256                                          | >256 | >8   | 1    | 1    | <0.06 | 0.06  | 0.03   | 0.06 | 1    | A395T, C461T                            | N/A                                       | N/A         | N/A         |
| 78                             | 64                                            | 64   | 1    | 1    | 1    | 0.12  | 0.12  | 0.06   | 0.06 | 1    | A428G                                   | 0.92                                      | 0.84        | 1.16        |
| 84                             | >256                                          | N/A  | 4    | 0.5  | 0.25 | <0.06 | 0.12  | 0.06   | 0.25 | 2    | A395T, C461T                            | 1.43                                      | 0.68        | 2.27        |
| 89                             | 8                                             | 16   | 0.25 | 0.25 | 0.12 | <0.06 | 0.12  | 0.06   | 0.12 | 0.25 | A395W, C461Y                            | 0.72                                      | 0.80        | 0.72        |
| 90                             | 8                                             | 8    | 0.5  | 0.5  | 0.5  | 0.12  | 0.06  | 0.03   | 0.06 | 1    | ND                                      | 1.35                                      | 1.84        | 1.13        |
| 99                             | >256                                          | >256 | >8   | 1    | 1    | <0.06 | 0.06  | 0.03   | 0.06 | 1    | A395T, C461T                            | 2.22                                      | 0.49        | 0.73        |
| 105                            | 128                                           | 128  | 8    | 0.5  | 0.5  | <0.06 | 0.12  | 0.06   | 0.06 | 1    | A395W, C461Y                            | 0.76                                      | 0.67        | 0.87        |
| 112                            | 32                                            | 64   | 0.25 | 0.25 | 0.25 | <0.06 | 0.03  | 0.03   | 0.06 | 0.5  | A395W, C461Y                            | 1.25                                      | 1.33        | 0.44        |
| 116                            | 64                                            | 64   | 2    | 0.25 | 0.12 | <0.06 | 0.25  | 0.06   | 0.12 | 1    | A395T, C461T                            | N/A                                       | N/A         | N/A         |



| Isolate number | MIC (minimal inhibitory concentration, µg/ml) |      |       |      |       |       |       |       |      |      | Missense mutations in <i>ERG11</i> gene | Fold expression level (log <sub>2</sub> ) |             |             |
|----------------|-----------------------------------------------|------|-------|------|-------|-------|-------|-------|------|------|-----------------------------------------|-------------------------------------------|-------------|-------------|
|                | FZ*                                           | FZ** | IZ    | VOR  | PZ    | FC    | AND   | MF    | CAS  | AB   |                                         | <i>ERG11</i>                              | <i>MDR1</i> | <i>CDR1</i> |
| 1              | 0.25                                          | 0.25 | 0.015 | 0.03 | 0.03  | <0.06 | 0.015 | 0.015 | 0.03 | 0.12 | ND                                      | 1.48                                      | 1.56        | 1.85        |
| 5              | 1                                             | 0.25 | 0.12  | 0.25 | 0.25  | <0.06 | 0.06  | 0.03  | 0.06 | 1    | ND                                      | 0.97                                      | 1.96        | 2.94        |
| 12             | 2                                             | 2    | 0.12  | 0.25 | 0.12  | <0.06 | 0.06  | 0.03  | 0.03 | 1    | ND                                      | 1.23                                      | 1.01        | 2.54        |
| 13             | 2                                             | 0.25 | 0.12  | 0.12 | 0.12  | 0.25  | 0.12  | 0.03  | 0.06 | 0.5  | ND                                      | 1.44                                      | 1.75        | 1.70        |
| 24             | 2                                             | 4    | 0.12  | 0.25 | 0.12  | <0.06 | 0.06  | 0.03  | 0.06 | 0.25 | ND                                      | 1.03                                      | 1.41        | 0.91        |
| 29             | 1                                             | 0.25 | 0.06  | 0.03 | 0.015 | <0.06 | 0.015 | 0.03  | 0.03 | 0.25 | ND                                      | 1.00                                      | 1.03        | 1.51        |
| 35             | 1                                             | 1    | 0.12  | 0.25 | 0.25  | 0.06  | 0.12  | 0.03  | 0.06 | 0.5  | ND                                      | 1.16                                      | 0.96        | 0.88        |
| 38             | 2                                             | 2    | 0.12  | 0.25 | 0.25  | <0.06 | 0.03  | 0.015 | 0.06 | 1    | ND                                      | 1.16                                      | 0.71        | 0.80        |
| 39             | 1                                             | 0.5  | 0.06  | 0.06 | 0.06  | <0.06 | 0.03  | 0.015 | 0.12 | 0.25 | ND                                      | N/A                                       | N/A         | N/A         |
| 48             | 2                                             | 2    | 0.12  | 0.03 | 0.03  | <0.06 | 0.25  | 0.12  | 0.12 | 0.5  | ND                                      | 0.75                                      | 0.62        | 0.72        |
| 53             | 1                                             | 1    | 0.12  | 0.25 | 0.25  | <0.06 | 0.12  | 0.03  | 0.25 | 1    | ND                                      | 0.78                                      | 0.72        | 1.01        |
| 55             | 1                                             | 0.5  | 0.06  | 0.25 | 0.12  | <0.06 | 0.12  | 0.015 | 0.25 | 0.5  | ND                                      | 1.62                                      | 1.26        | 1.35        |
| 57             | 1                                             | 1    | 0.12  | 0.12 | 0.06  | <0.06 | 0.03  | 0.12  | 0.06 | 0.25 | ND                                      | 1.05                                      | 2.64        | 1.19        |
| 72             | 2                                             | 2    | 0.12  | 0.25 | 0.12  | <0.06 | 0.12  | 0.03  | 0.12 | 0.5  | ND                                      | 0.74                                      | 0.66        | 0.71        |
| 77             | 1                                             | 1    | 0.12  | 0.25 | 0.12  | <0.06 | 0.12  | 0.03  | 0.12 | 0.5  | ND                                      | 1.14                                      | 1.16        | 1.08        |
| 92             | 2                                             | 2    | 0.12  | 0.5  | 0.25  | <0.06 | 0.03  | 0.03  | 0.06 | 1    | ND                                      | 1.21                                      | 1.08        | 0.95        |
| 93             | 1                                             | 1    | 0.12  | 0.25 | 0.25  | <0.06 | 0.12  | 0.06  | 0.06 | 1    | ND                                      | 0.90                                      | 0.74        | 0.60        |
| 102            | 1                                             | 1    | 0.06  | 0.12 | 0.06  | 64    | 0.03  | 0.03  | 0.06 | 0.5  | ND                                      | 1.54                                      | 1.07        | 0.66        |
| 103            | 2                                             | 1    | 0.12  | 0.25 | 0.25  | <0.06 | 0.12  | 0.06  | 0.12 | 1    | ND                                      | 0.95                                      | 0.85        | 0.90        |
| 108            | 1                                             | 0.5  | 0.03  | 0.06 | 0.06  | <0.06 | 0.03  | 0.015 | 0.06 | 0.25 | ND                                      | 2.24                                      | 4.86        | 3.56        |
| 118            | 0.5                                           | 0.5  | 0.03  | 0.12 | 0.12  | <0.06 | 0.12  | 0.03  | 0.03 | 0.5  | ND                                      | 1.20                                      | 0.50        | 0.66        |
| 119            | 1                                             | 1    | 0.12  | 0.12 | 0.06  | <0.06 | 0.06  | 0.03  | 0.03 | 0.5  | ND                                      | 0.69                                      | 0.95        | 0.74        |
| 131            | 1                                             | 1    | 0.06  | 0.12 | 0.12  | <0.06 | 0.03  | 0.03  | 0.06 | 0.25 | ND                                      | 1.53                                      | 1.48        | 1.16        |
| 132            | 1                                             | 1    | 0.06  | 0.12 | 0.25  | <0.06 | 0.06  | 0.06  | 0.12 | 0.5  | ND                                      | 0.51                                      | 1.07        | 0.57        |
| 135            | 2                                             | 1    | 0.12  | 0.12 | 0.06  | <0.06 | 0.12  | 0.03  | 0.12 | 0.5  | ND                                      | 0.94                                      | 0.81        | 0.76        |
| 136            | 1                                             | 1    | 0.12  | 0.25 | 0.12  | <0.06 | 0.06  | 0.03  | 0.06 | 1    | ND                                      | N/A                                       | N/A         | N/A         |
| 137            | 2                                             | 4    | 0.12  | 0.25 | 0.12  | <0.06 | 0.12  | 0.06  | 0.12 | 1    | ND                                      | 1.29                                      | 1.21        | 0.95        |
| 140            | 2                                             | 2    | 0.12  | 0.25 | 0.12  | <0.06 | 0.03  | 0.03  | 0.06 | 0.25 | ND                                      | 1.58                                      | 1.02        | 1.25        |

| Isolate number | MIC (minimal inhibitory concentration, µg/ml) |      |       |      |       |       |       |      |      |      | Missense mutations in <i>ERG11</i> gene | Fold expression level (log <sub>2</sub> ) |             |             |
|----------------|-----------------------------------------------|------|-------|------|-------|-------|-------|------|------|------|-----------------------------------------|-------------------------------------------|-------------|-------------|
|                | FZ*                                           | FZ** | IZ    | VOR  | PZ    | FC    | AND   | MF   | CAS  | AB   |                                         | <i>ERG11</i>                              | <i>MDR1</i> | <i>CDR1</i> |
| 189            | 2                                             | 1    | 0.12  | 0.25 | 0.12  | <0.06 | 0.12  | 0.03 | 0.25 | 1    | ND                                      | 0.96                                      | 0.07        | 1.14        |
| 198            | 0.5                                           | 0.25 | 0.015 | 0.03 | 0.015 | <0.06 | 0.12  | 0.03 | 0.12 | 0.12 | ND                                      | N/A                                       | N/A         | N/A         |
| 208            | 1                                             | 1    | 0.06  | 0.06 | 0.06  | 0.06  | 0.12  | 0.03 | 0.12 | 0.5  | ND                                      | 1.67                                      | 2.16        | 0.97        |
| 215            | 1                                             | 0.5  | 0.06  | 0.12 | 0.03  | 0.12  | 0.12  | 0.03 | 0.12 | 1    | ND                                      | 0.46                                      | 0.64        | 0.27        |
| 221            | 2                                             | 1    | 0.12  | 0.25 | 0.12  | <0.06 | 0.06  | 0.03 | 0.06 | 0.5  | ND                                      | 0.74                                      | 0.68        | 0.86        |
| 229            | 2                                             | 2    | 0.12  | 0.25 | 0.12  | 0.12  | 0.015 | 0.03 | 0.06 | 0.5  | ND                                      | 0.60                                      | 0.83        | 0.59        |
| 239            | 2                                             | 2    | 0.12  | 0.25 | 0.25  | <0.06 | 0.06  | 0.03 | 0.03 | 1    | ND                                      | 0.84                                      | 0.62        | 1.01        |
| 240            | 2                                             | 2    | 0.12  | 0.25 | 0.12  | <0.06 | 0.06  | 0.03 | 0.25 | 1    | ND                                      | 0.55                                      | 1.00        | 0.68        |

\*MIC value from Sentititre YeastOne, \*\*MIC value from microbroth dilution along CLSI recommendation document M60.

Abbreviation: FZ, fluconazole; IZ, itraconazole; VOR, voriconazole; PZ, posaconazole; FC, 5-flucytosine; AND, anidulafungin; MF, micafungin; CAS; caspofungin; AB, amphotericin-B; N/A, not available; ND, not detected.

## References

1. Vandeputte, P.; Larcher, G.; Bergès, T.; Renier, G.; Chabasse, D.; Bouchara, J.-P. Mechanisms of azole resistance in a clinical isolate of *Candida tropicalis*. *Antimicrobial agents and chemotherapy* **2005**, 49, 4608-4615, doi:10.1128/AAC.49.11.4608-4615.2005.
2. Jiang, C.; Dong, D.; Yu, B.; Cai, G.; Wang, X.; Ji, Y.; Peng, Y. Mechanisms of azole resistance in 52 clinical isolates of *Candida tropicalis* in China. *Journal of Antimicrobial Chemotherapy* **2012**, 68, 778-785, doi:10.1093/jac/dks481.
